# Supplementary material for: Commercial Mannoproteins Improve the Mouthfeel and Colour of Wines Obtained by Excessive Tannin Extraction
Source: MDPI journal article supplement (doi:10.3390/molecules26144133), 2021-07-07
Supplement: s1 [file s1]

**Table S1.** Definitions of the attributes used to characterise the mouthfeel of wines.

| Attribute  | Definition                                                                                                        |
|------------|-------------------------------------------------------------------------------------------------------------------|
| Silk       | Tactile sensation like silk                                                                                       |
| Velvet     | Tactile sensation like velvet                                                                                     |
| Dry        | A feeling of lack of lubrication in the mouth                                                                     |
| Corduroy   | A sensation of a slight wrinkling of the soft palate that tongue movements can feel                               |
| Adhesive   | The feeling that mouth surfaces are sticking yet can be pulled away from each other with slight pressure          |
| Hard       | Effect of astringency and bitterness                                                                              |
| Aggressive | Excessive astringency of strong roughing nature                                                                   |
| Soft       | Light and finely textured astringency                                                                             |
| Mouthcoat  | Like a coating film that adheres to mouth surfaces                                                                |
| Rich       | High flavour concentration with balanced astringency                                                              |
| Green      | Combined effect of an excess of acidity and astringency                                                           |
| Grainy     | A sensation of micro-particles in the mouth                                                                       |
| Satin      | A smooth and sliding astringency                                                                                  |
| Pucker     | The reflex action of mouth surfaces being brought together and released in an attempt to lubricate mouth surfaces |
| Full-Body  | A sensation of high viscosity                                                                                     |
| Persistent | An overall sensation (flavour, tactile, taste) which lasts over time                                              |

**Table S2.** Analyses of base parameters of extended maceration (E), marc-pressed (P), and free-run (F) Sangiovese wines before aging (t0).

|      | Alcohol (% v/v) | pH          | Tritatable<br>acidity<br>(g/L tartaric<br>acid) | Volatile acidity<br>(g/L acetic acid) | free SO <sub>2</sub> (mg/L) | total SO <sub>2</sub> (mg/L) |
|------|-----------------|-------------|-------------------------------------------------|---------------------------------------|-----------------------------|------------------------------|
| E-t0 | 14.20 ± 0.47    | 3.17 ± 0.01 | 6.7 ± 0.4                                       | 0.5 ± 0.0                             | 19.1 ± 0.2                  | 33.3 ± 0.9                   |
| P-t0 | 13.02 ± 0.04    | 3.31 ± 0.01 | 6.2 ± 0.0                                       | 0.5 ± 0.0                             | 24.2 ± 2.4                  | 35.1 ± 3.2                   |
| F-t0 | 13.17 ± 0.11    | 3.24 ± 0.00 | 6.3 ± 0.2                                       | 0.4 ± 0.0                             | 22.1 ± 1.4                  | 35.2 ± 2.3                   |
